# Supplementary material
Source: publisher figshare collection journal article supplement (https://springernature.figshare.com/ndownloader/files/22487093)
Supplement: Supplementary file 1 [file 22487093]

## Sheet: #1
British Museum BMNH uncatalogued, juvenile male, Algiers.
	mm	thousands
1	1469	1000	disc width
2	580	394.826	disc length, from midpoint of rostral margin to free rcar tip of pectoral fin
3			anterior projection, from midpoint of rostral margin to point on midline of back, where line of greatest width crossesi
4	588	400.272	from midpoint of rostral margin to free rear tip of pelvi c fin;
5	503	342.41	predorsal distance, from midpoint of rostral margin to origin of dorsal fin
6	57	38.8019	dorsal fin base length, from origin to insertion
7	50	34.0368	dorsal fin height, along perpendicular from apex to base
8	525	357.386	precloacal distance, from midpoint of rostral margin to anterior margin of venti
9			tail length, anterior margin of vent to tip of tail
10	59	40.1634	1st gill opening length
11	59	40.1634	2nd gill opening length
12	60	40.8441	3rd gill opening length
13	60	40.8441	4th gill opening length
14	43	29.2716	5th gill opening length
15	142	96.6644	first interbranchial distance, between inner margins of 1st gill openings
16	39	26.5487	fifth interbranchial distance, between inner margins of 1st gill openings
17	152	103.472	from midpoint of rostral margin to transverse line of 1st gill openings
18	257	174.949	from midpoint of rostral margin to transverse line of 5th gill openings
19	127	86.4534	pelvic fin length, from anterior margin of vent to free rear tip of pelvic
20	157	106.875	cephalic fin length, from tip of cephalic fin to corner of month, where edge of lower jaw merges with side of cephalic fin
21			cephalic fin width, from antorbital process perpendicnlar to ventral margin of unrolled cephalic fin
22	36	24.5065	diameter of eye ball
23	196	133.424	cranial width, maximum dorsal width between antorbital processes
24			preoral length, from midpoint of rostral margin to midpoint of free rear margin of nasal curtain
25	197	134.105	head length, from tip of cephalic fin to posterior end of spiracle
26	150	102.11	mouth width, between points where edge of lower jaw merges with sides of cephalic fins
27	128	87.1341	internarial distance, between origins of nasal curtain
28	111	75.5616	upper toothband length, between external margins of outermost toothrows
29	114	77.6038	lower toothband length, between external margins of outermost toothrows

## Sheet: #2
Genoa Museum of Natural History, female
	mm	thousands
1	1923	1000	disc width
2	865	449.818	disc length, from midpoint of rostral margin to free rcar tip of pectoral fin
3	606	315.133	anterior projection, from midpoint of rostral margin to point on midline of back, where line of greatest width crossesi
4	875	455.018	from midpoint of rostral margin to free rear tip of pelvi c fin;
5	708	368.175	predorsal distance, from midpoint of rostral margin to origin of dorsal fin
6	82	42.6417	dorsal fin base length, from origin to insertion
7	69	35.8814	dorsal fin height, along perpendicular from apex to base
8	721	374.935	precloacal distance, from midpoint of rostral margin to anterior margin of venti
9	2010	1045.24	tail length, anterior margin of vent to tip of tail
10	91	47.3219	1st gill opening length
11	98	50.962	2nd gill opening length
12	99	51.4821	3rd gill opening length
13	92	47.8419	4th gill opening length
14	71	36.9215	5th gill opening length
15	194	100.884	first interbranchial distance, between inner margins of 1st gill openings
16	88	45.7618	fifth interbranchial distance, between inner margins of 1st gill openings
17	195	101.404	from midpoint of rostral margin to transverse line of 1st gill openings
18	354	184.087	from midpoint of rostral margin to transverse line of 5th gill openings
19	188	97.7639	pelvic fin length, from anterior margin of vent to free rear tip of pelvic
20	207	107.644	cephalic fin length, from tip of cephalic fin to corner of month, where edge of lower jaw merges with side of cephalic fin
21	96	49.922	cephalic fin width, from antorbital process perpendicnlar to ventral margin of unrolled cephalic fin
22	37	19.2408	diameter of eye ball
23	248	128.965	cranial width, maximum dorsal width between antorbital processes
24	68	35.3614	preoral length, from midpoint of rostral margin to midpoint of free rear margin of nasal curtain
25	250	130.005	head length, from tip of cephalic fin to posterior end of spiracle
26	193	100.364	mouth width, between points where edge of lower jaw merges with sides of cephalic fins
27	171	88.9236	internarial distance, between origins of nasal curtain
28	145	75.403	upper toothband length, between external margins of outermost toothrows
29	153	79.5632	lower toothband length, between external margins of outermost toothrows

## Sheet: #3
Firenze Natural History Museum "La Specola", term embryo, male
	mm	thousands
1	1659	1000	disc width
2	791	476.793	disc length, from midpoint of rostral margin to free rcar tip of pectoral fin
3	544	327.908	anterior projection, from midpoint of rostral margin to point on midline of back, where line of greatest width crossesi
4	797	480.41	from midpoint of rostral margin to free rear tip of pelvi c fin;
5	667	402.049	predorsal distance, from midpoint of rostral margin to origin of dorsal fin
6	76	45.8107	dorsal fin base length, from origin to insertion
7	63	37.9747	dorsal fin height, along perpendicular from apex to base
8	672	405.063	precloacal distance, from midpoint of rostral margin to anterior margin of venti
9		0	tail length, anterior margin of vent to tip of tail
10	76	45.8107	1st gill opening length
11	77	46.4135	2nd gill opening length
12	79	47.619	3rd gill opening length
13	78	47.0163	4th gill opening length
14	60	36.1664	5th gill opening length
15	164	98.8547	first interbranchial distance, between inner margins of 1st gill openings
16	76	45.8107	fifth interbranchial distance, between inner margins of 1st gill openings
17	173	104.28	from midpoint of rostral margin to transverse line of 1st gill openings
18	310	186.86	from midpoint of rostral margin to transverse line of 5th gill openings
19	166	100.06	pelvic fin length, from anterior margin of vent to free rear tip of pelvic
20	182	109.705	cephalic fin length, from tip of cephalic fin to corner of month, where edge of lower jaw merges with side of cephalic fin
21	95	57.2634	cephalic fin width, from antorbital process perpendicnlar to ventral margin of unrolled cephalic fin
22	37	22.3026	diameter of eye ball
23	224	135.021	cranial width, maximum dorsal width between antorbital processes
24	59	35.5636	preoral length, from midpoint of rostral margin to midpoint of free rear margin of nasal curtain
25	210	126.582	head length, from tip of cephalic fin to posterior end of spiracle
26	166	100.06	mouth width, between points where edge of lower jaw merges with sides of cephalic fins
27	156	94.0325	internarial distance, between origins of nasal curtain
28	125	75.3466	upper toothband length, between external margins of outermost toothrows
29	124	74.7438	lower toothband length, between external margins of outermost toothrows

## Sheet: #4
Milano Museum of Natural History, adult male
	mm	thousands
1	2421	1000	disc width
2	1129	466.336	disc length, from midpoint of rostral margin to free rcar tip of pectoral fin
3	745	307.724	anterior projection, from midpoint of rostral margin to point on midline of back, where line of greatest width crossesi
4	1144	472.532	from midpoint of rostral margin to free rear tip of pelvi c fin;
5	941	388.682	predorsal distance, from midpoint of rostral margin to origin of dorsal fin
6	97	40.0661	dorsal fin base length, from origin to insertion
7	78	32.2181	dorsal fin height, along perpendicular from apex to base
8	909	375.465	precloacal distance, from midpoint of rostral margin to anterior margin of venti
9	2283	942.999	tail length, anterior margin of vent to tip of tail
10	133	54.936	1st gill opening length
11	134	55.349	2nd gill opening length
12	127	52.4577	3rd gill opening length
13	116	47.9141	4th gill opening length
14	86	35.5225	5th gill opening length
15	249	102.85	first interbranchial distance, between inner margins of 1st gill openings
16	108	44.6097	fifth interbranchial distance, between inner margins of 1st gill openings
17	251	103.676	from midpoint of rostral margin to transverse line of 1st gill openings
18	443	182.982	from midpoint of rostral margin to transverse line of 5th gill openings
19	255	105.328	pelvic fin length, from anterior margin of vent to free rear tip of pelvic
20	254	104.915	cephalic fin length, from tip of cephalic fin to corner of month, where edge of lower jaw merges with side of cephalic fin
21	117	48.3271	cephalic fin width, from antorbital process perpendicnlar to ventral margin of unrolled cephalic fin
22	47	19.4135	diameter of eye ball
23	341	140.851	cranial width, maximum dorsal width between antorbital processes
24	84	34.6964	preoral length, from midpoint of rostral margin to midpoint of free rear margin of nasal curtain
25	316	130.525	head length, from tip of cephalic fin to posterior end of spiracle
26	273	112.763	mouth width, between points where edge of lower jaw merges with sides of cephalic fins
27	226	93.3499	internarial distance, between origins of nasal curtain
28	193	79.7191	upper toothband length, between external margins of outermost toothrows
29	310	128.046	lower toothband length, between external margins of outermost toothrows

## Sheet: stats
		#1 male	#2 female	#3 male	#4 male		mean	SD	CV		M. japanica (n=19)*	CV		% difference
1	disc width	1000	1000	1000	1000		1000	0	0
2	disc length, from midpoint of rostral margin to free rcar tip of pectoral fin	394.826	449.818	476.793	466.336		446.943	36.4762	8.16126		497.4	4.2		11.2892
3	anterior projection, from midpoint of rostral margin to point on midline of back, where line of greatest width crosses		315.133	327.908	307.724		316.922	10.2104	3.22174		346	4.8		9.17524
4	from midpoint of rostral margin to free rear tip of pelvi c fin;	400.272	455.018	480.41	472.532		452.058	36.118	7.98969		516.1	5.6		14.1667
5	predorsal distance, from midpoint of rostral margin to origin of dorsal fin	342.41	368.175	402.049	388.682		375.329	25.9946	6.9258		416.1	3.9		10.8627
6	dorsal fin base length, from origin to insertion	38.8019	42.6417	45.8107	40.0661		41.8301	3.09762	7.40525		44.1	9.4		5.42646
7	dorsal fin height, along perpendicular from apex to base	34.0368	35.8814	37.9747	32.2181		35.0277	2.4691	7.049		42.3	8.4		20.7614
8	precloacal distance, from midpoint of rostral margin to anterior margin of venti	357.386	374.935	405.063	375.465		378.212	19.7737	5.22821		407.9	4.7		7.8495
9	tail length, anterior margin of vent to tip of tail		1045.24	0	942.999		662.747	576.228	86.9454		910.6	14.9		37.3979
10	1st gill opening length	40.1634	47.3219	45.8107	54.936		47.058	6.08889	12.9391		52.7	5.2		11.9895
11	2nd gill opening length	40.1634	50.962	46.4135	55.349		48.222	6.49396	13.4668		57.2	5.4		18.6181
12	3rd gill opening length	40.8441	51.4821	47.619	52.4577		48.1007	5.26962	10.9554		57	6		18.5013
13	4th gill opening length	40.8441	47.8419	47.0163	47.9141		45.9041	3.39782	7.402		53.2	7		15.8938
14	5th gill opening length	29.2716	36.9215	36.1664	35.5225		34.4705	3.51276	10.1906		40.3	7.6		16.9116
15	first interbranchial distance, between inner margins of 1st gill openings	96.6644	100.884	98.8547	102.85		99.8133	2.6585	2.66347		115.4	2.7		15.6158
16	fifth interbranchial distance, between inner margins of 1st gill openings		45.7618	45.8107	44.6097		45.3941	0.679759	1.49746		52.7	11.2		16.0944
17	from midpoint of rostral margin to transverse line of 1st gill openings	103.472	101.404	104.28	103.676		103.208	1.25053	1.21166		113.8	4.1		10.2629
18	from midpoint of rostral margin to transverse line of 5th gill openings	174.949	184.087	186.86	182.982		182.22	5.11409	2.80655		210	3.7		15.2456
19	pelvic fin length, from anterior margin of vent to free rear tip of pelvic	86.4534	97.7639	100.06	105.328		97.4015	7.95607	8.16833		119.4	7.1		22.5854
20	cephalic fin length, from tip of cephalic fin to corner of month, where edge of lower jaw merges with side of cephalic fin	106.875	107.644	109.705	104.915		107.285	1.98048	1.846		122.7	2.4		14.3684
21	cephalic fin width, from antorbital process perpendicnlar to ventral margin of unrolled cephalic fin		49.922	57.2634	48.3271		51.8375	4.76615	9.1944		60.6	7.7		16.9038
22	diameter of eye ball	24.5065	19.2408	22.3026	19.4135		21.3658	2.52116	11.8		23.2	6.3		8.58463
23	cranial width, maximum dorsal width between antorbital processes	133.424	128.965	135.021	140.851		134.565	4.9119	3.6502		160.6	4.3		19.3473
24	preoral length, from midpoint of rostral margin to midpoint of free rear margin of nasal curtain		35.3614	35.5636	34.6964		35.2071	0.453711	1.28869		41	4.2		16.4537
25	head length, from tip of cephalic fin to posterior end of spiracle	134.105	130.005	126.582	130.525		130.304	3.07872	2.36271		147.2	4.2		12.9664
26	mouth width, between points where edge of lower jaw merges with sides of cephalic fins	102.11	100.364	100.06	112.763		103.824	6.02731	5.80529		119.6	3.9		15.1944
27	internarial distance, between origins of nasal curtain	87.1341	88.9236	94.0325	93.3499		90.86	3.36138	3.69951		105.8	3.4		16.4429
28	upper toothband length, between external margins of outermost toothrows	75.5616	75.403	75.3466	79.7191		76.5076	2.14296	2.80098		89.5	3.7		16.9819
29	lower toothband length, between external margins of outermost toothrows	77.6038	79.5632	74.7438			77.3036	2.42367	3.13526		90.3	4.8		16.8121
* Sample from Notarbartolo di Sciara (1987)
